## Statin induced myalgia on high intensity statin in patients with Acute Coronary Syndrome

D. Kumar, U. Yasin, T. Saghir, J. Akbar Sial, S. Khatti, K. Khan, N. Khan, M. Naeem Mengal, N. Qamar

National Institute of Cardiovascular Diseases (NICVD), Karachi, Pakistan

**Funding Acknowledgement:** Type of funding sources: None.

**Background:** High intensity statins are recommended in patients with acute coronary syndrome. Statins inhibit atherosclerotic plaque formation in the coronary arteries and reducing the burden of ischemic heart disease, therefore decreasing the morbidity and mortality. Muscle symptoms are most common adverse effect of statins. Hence, the aim of this study is to determine the statin induced myalgia by the statin myalgia clinical score.

**Purpose:** To monitor the Statin induced myalgia on high intensity statin in patients with Acute Coronary Syndrome

**Methods:** This was an prospective observational study comprised of 418 patients with acute coronary syndrome who were commenced on high intensity statins (Rosuvastatin 20–40mg & Atorvastatin 40–80). These patients were followed at 4 weeks, 8 weeks and 12 weeks subsequently and the clinical myalgia score (SAMS-CI) was calculated at each visit to determine the statin induced myalgia. SAMS-CI was categorized as unlikely (2–6), possible (7–8) and probable (9–11)

**Results:** From 418 patients, 327 were males and 91 were females. Mean age was  $55.6 \pm 11.14$ . Only 19 ( $7.63 \pm 1.8$ ) patients developed muscle symptoms on high intensity statins (Rosuvastatin 20 mg and Atorvastatin 40 mg) on SAMS-CI Score. 5 patients were unlikely to develop myalgia on SAMS-CI and continued with the same dosage without any new symptoms. 6 patients were possible on SAMS-CI, therefore the dosage of these patients were decreased to moderate intensity statin (Rosuvastatin 10mg, Atorvastatin 20 mg), their symptoms were resolved and continued with the moderate intensity statins. Furthermore, Statin was hold in 8 patients in the probable category for 4 weeks until the resolution of symptoms followed by moderate intensity statins.

**Conclusion:** Statin induced myalgia is more reported in old aged and female patients. Most of the patients can better tolerate the lower range of high intensity statins with the similar benefits and should be prescribed in every patient
